# Supplementary material for: Direct determination of zinc in plasma by graphite furnace atomic absorption spectrometry using palladium/magnesium and EDTA matrix modification with high temperature pyrolysis
Source: Royal Society of Chemistry journal article supplement (doi:10.1039/c7ja00033b), 2017-01-01
Supplement: c7ja00033b1.pdf [file c7ja00033b1.pdf]

**Electronic Supplementary Information for:**

**Direct determination of zinc in plasma by graphite furnace atomic absorption spectrometry using palladium/magnesium and EDTA matrix modification with high temperature pyrolysis†**

*Brian J Stevens<sup>a</sup>, Dominic J Hare<sup>ab</sup>, Irene Volitakis<sup>a</sup>, Robert A Cherny<sup>a</sup> and Blaine R Roberts<sup>ac\*</sup>*

<sup>a</sup> *The Florey Institute of Neuroscience and Mental Health, The University of Melbourne, Parkville, Victoria, Australia. Email: [blaine.roberts@florey.edu.au](mailto:blaine.roberts@florey.edu.au); Ph: +61 3 9035 6635*

<sup>b</sup> *Elemental Bio-imaging Facility, University of Technology Sydney, Broadway, New South Wales, Australia.*

<sup>c</sup> *Co-operative Research Centre for Mental Health, <http://www.mentalhealthcrc.com>*

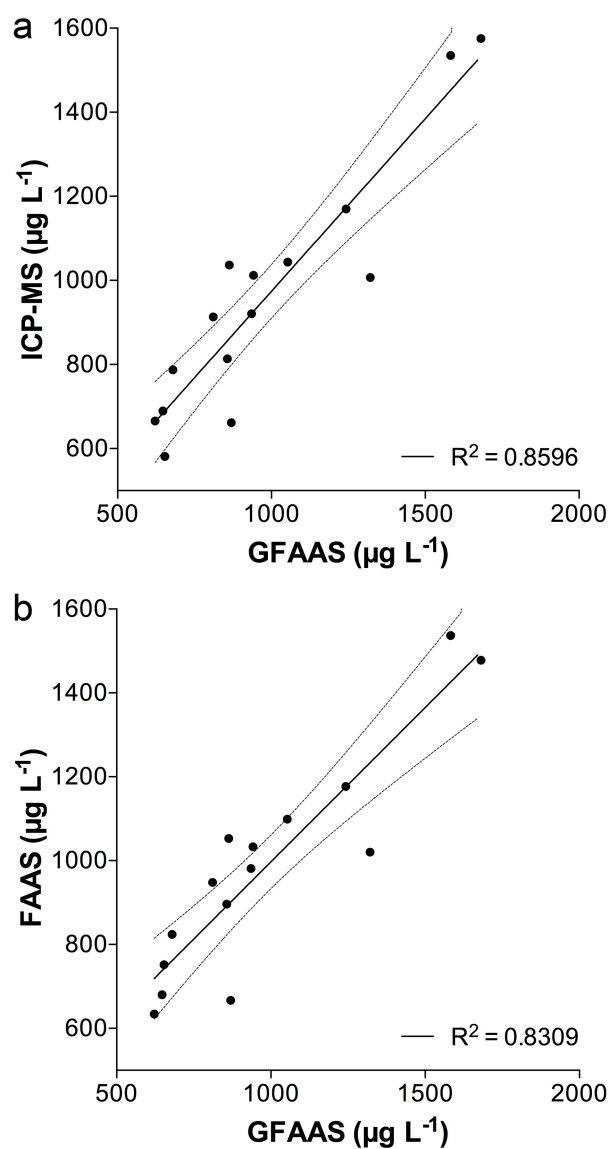

**Figure S1:** Comparison of developed GFAAS method with ICP-MS (a) and FAAS (b) detection methods. Dashed line shows 95% confidence interval.
